# Supplementary material for: Energy-storable dye-sensitized solar cell with a polypyrrole electrode
Source: Royal Society of Chemistry journal article supplement (doi:10.1039/b400439f), 2004-01-01
Supplement: b400439f.doc [file b400439f.doc]

# Electronic Supplementary Information

### **Energy-storable dye sensitized solar cell with a polypyrrole electrode**

Hiroki Nagaia*a* and Hiroshi Segawa**a,b*

*a Department of Applied Chemistry, Graduate School of Engineering, The University of Tokyo,*

*b* *Department of Chemistry, Graduate School of Arts and Sciences, The University of Tokyo, 3-8-1 Komaba, Meguro-ku, Tokyo 153-8902, Japan*

1. Surface SEM image of TiO2 film.


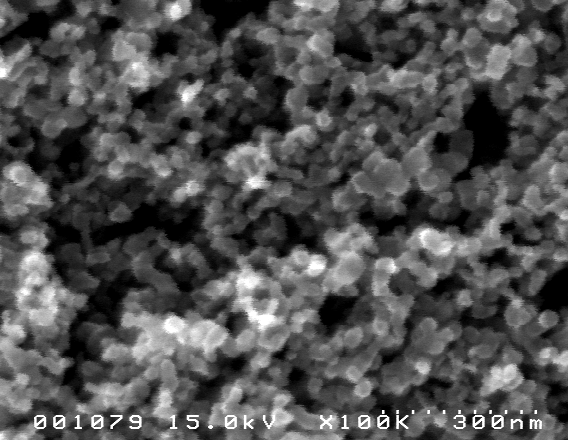


1. Photocurrent-voltage curve of the DSSC and ES-DSSC. Polymerization electricity of polypyrrole film is 200mC/cm2.

1. Several charging/discharging cycles of the ES-DSSC. Polymerization electricity of polypyrrole film is 50mC/cm2. Each photo-charging time is 15min.
